# Supplementary material
Source: MDPI journal article supplement (https://www.mdpi.com/2311-5629/7/4/85)
Supplement: s1 [file s1]

# Solvent and substituent effect on selectivity of triphenylether based ionophores: A voltammetric study

Susheel K Mittal\*, Shivali Gupta, Manmohan Chhibber

School of Chemistry and Biochemistry

Thapar Institute of Engineering and Technology (Deemed University),

Patiala 147004, Punjab, India

E-mail: smittal@thapar.edu

## Figure Captions

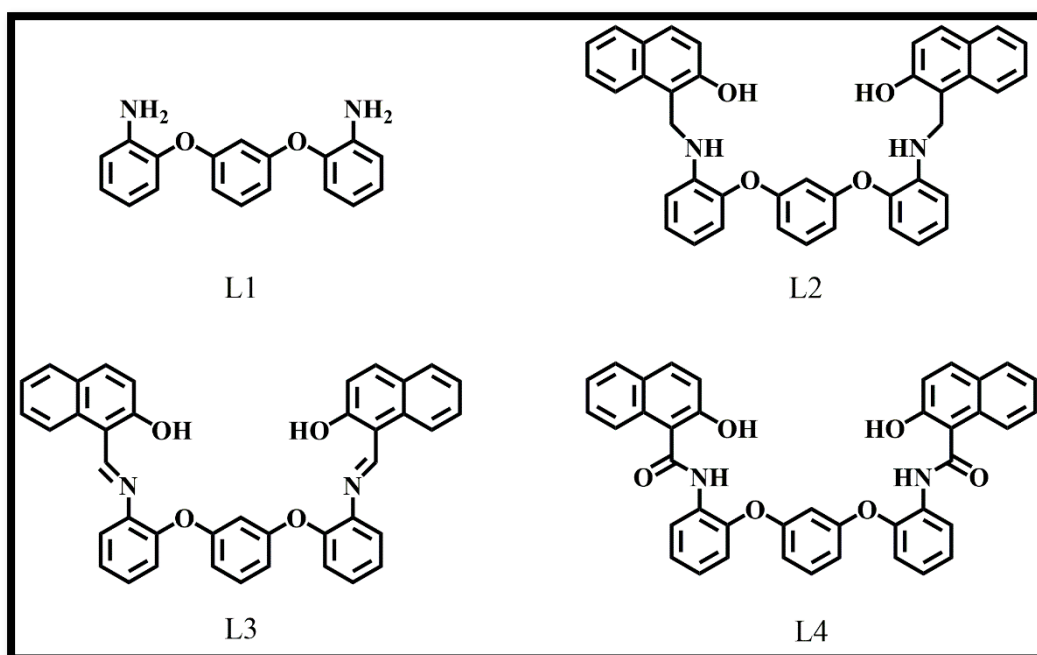

**Figure S1.** Molecular structure of L1-L4

Figure S2.  $^1\text{H}$  NMR of L1

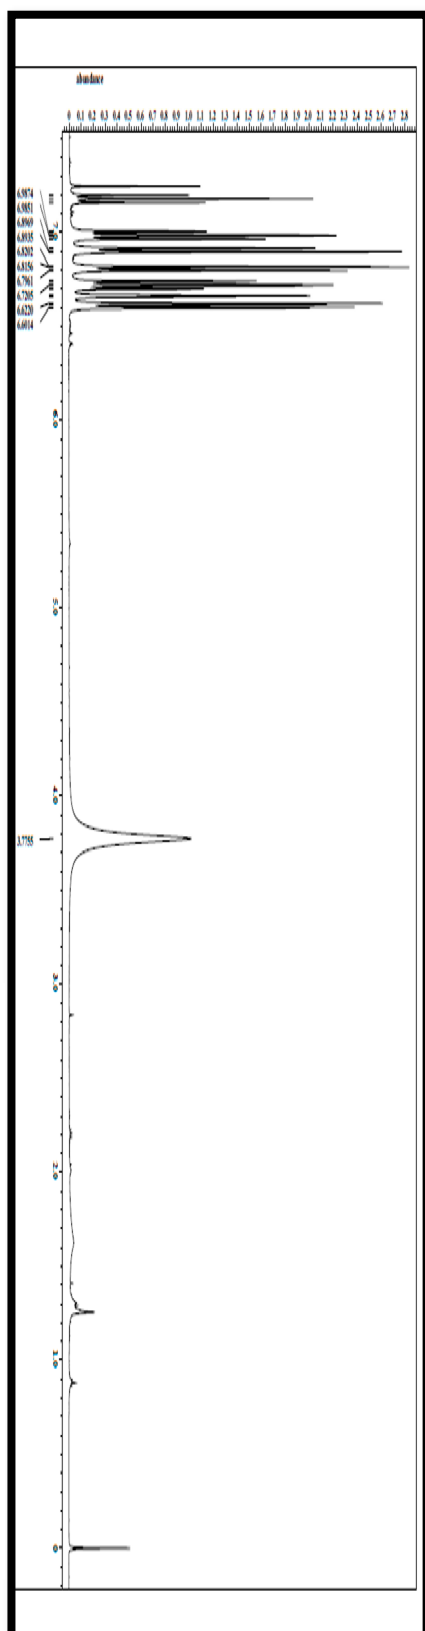

Figure S3.  $^{13}\text{C}$  NMR of L1

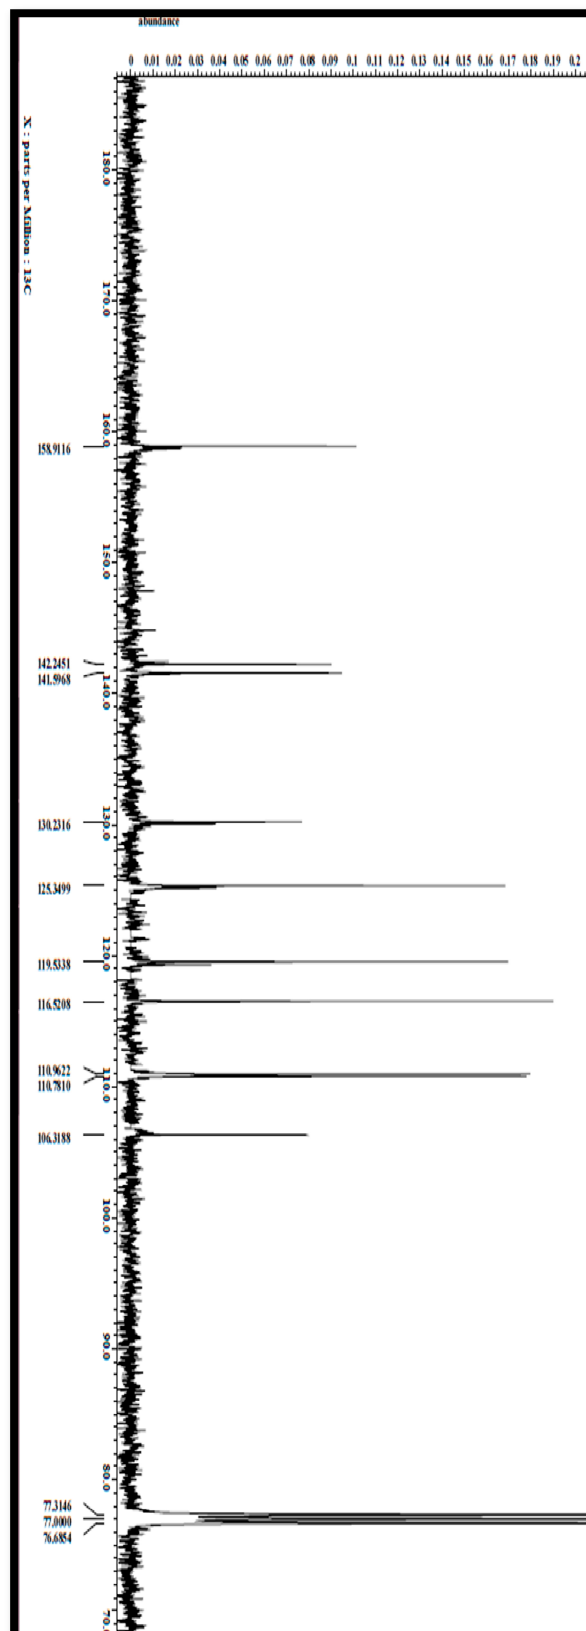

Figure S4.  $^1\text{H}$  NMR of L2

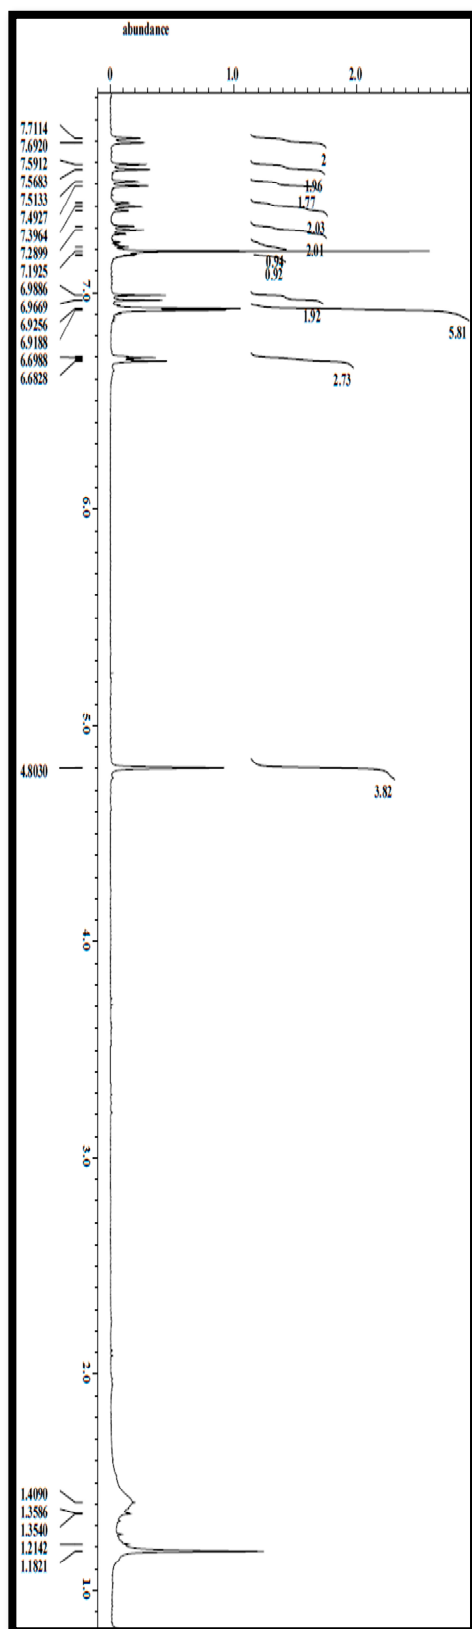

Figure S5.  $^{13}\text{C}$  NMR of L2

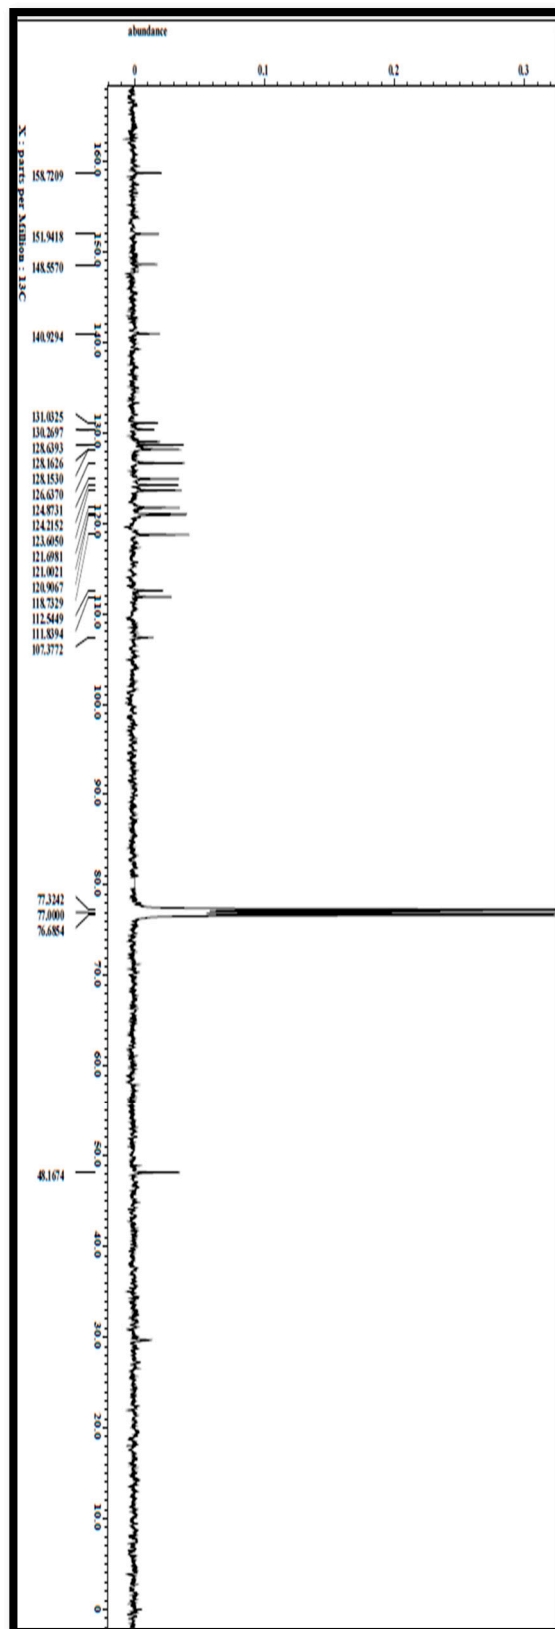

Figure S6.  $^1\text{H}$  NMR of L3

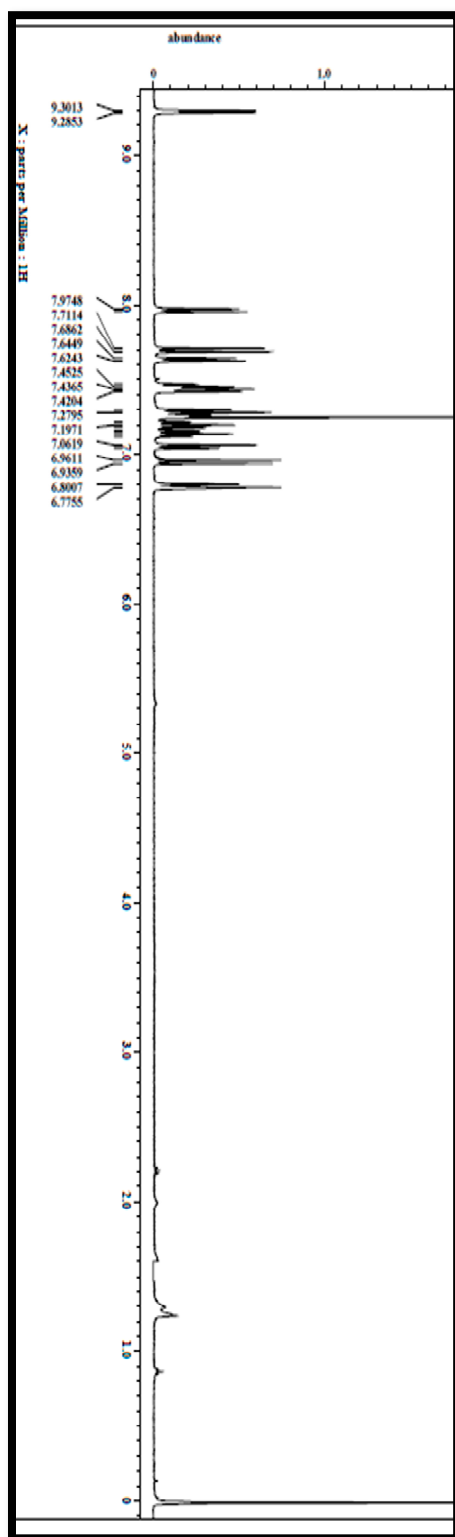

Figure S7.  $^{13}\text{C}$  NMR of L3

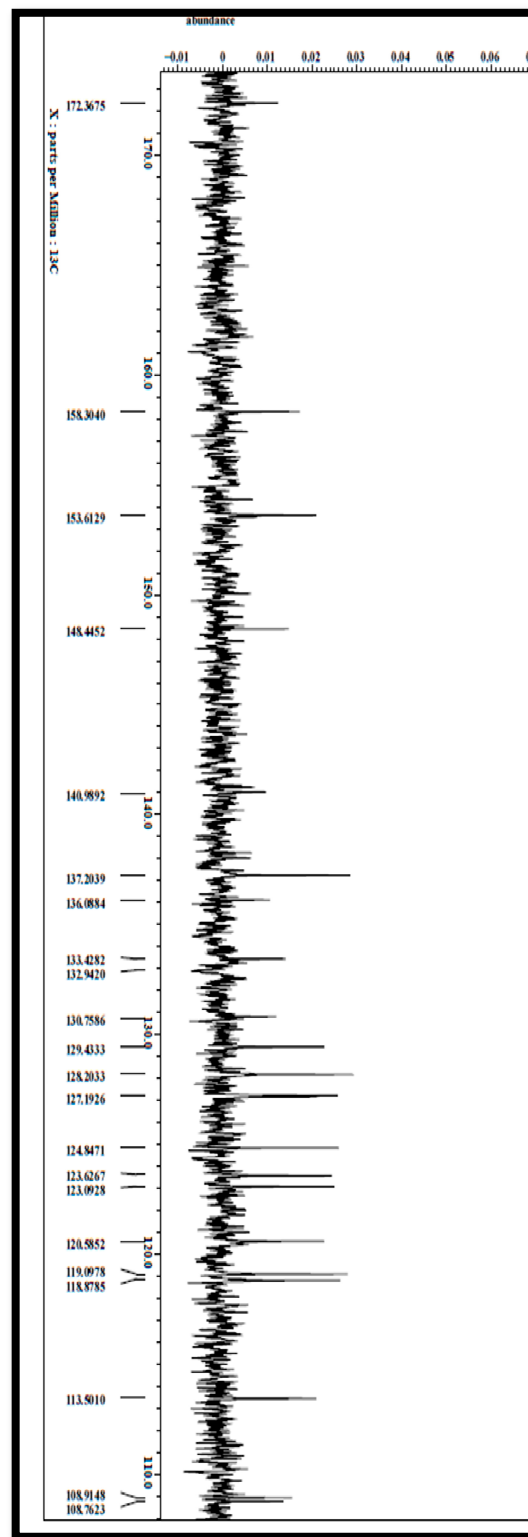



Figure S8.  $^1\text{H}$  NMR of L4

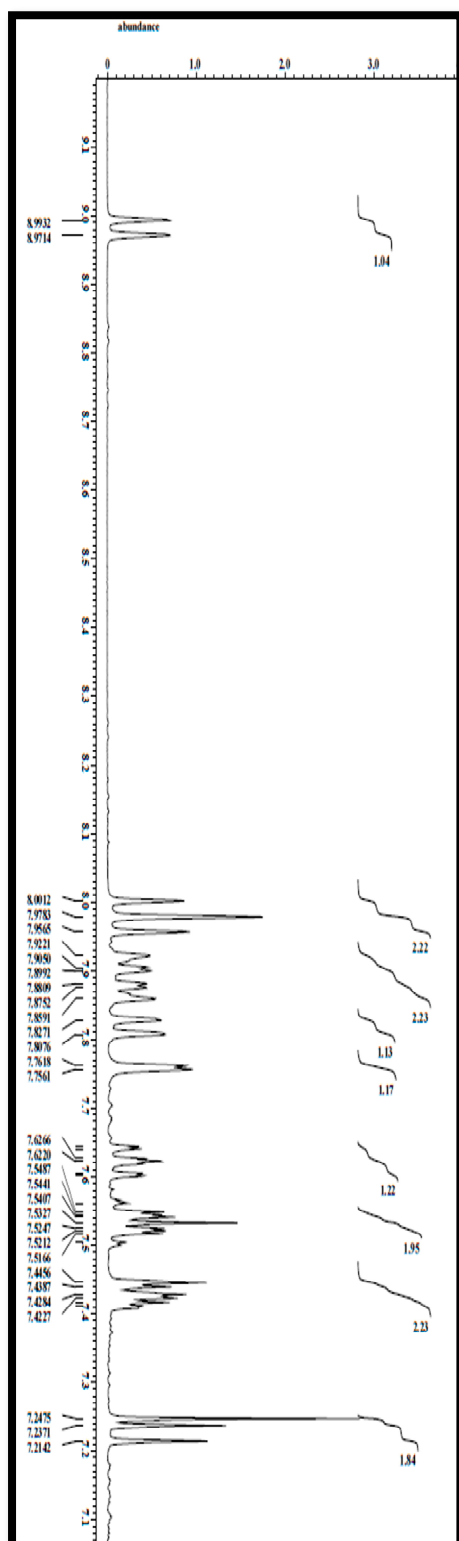

Figure S9.  $^{13}\text{C}$  NMR of L4

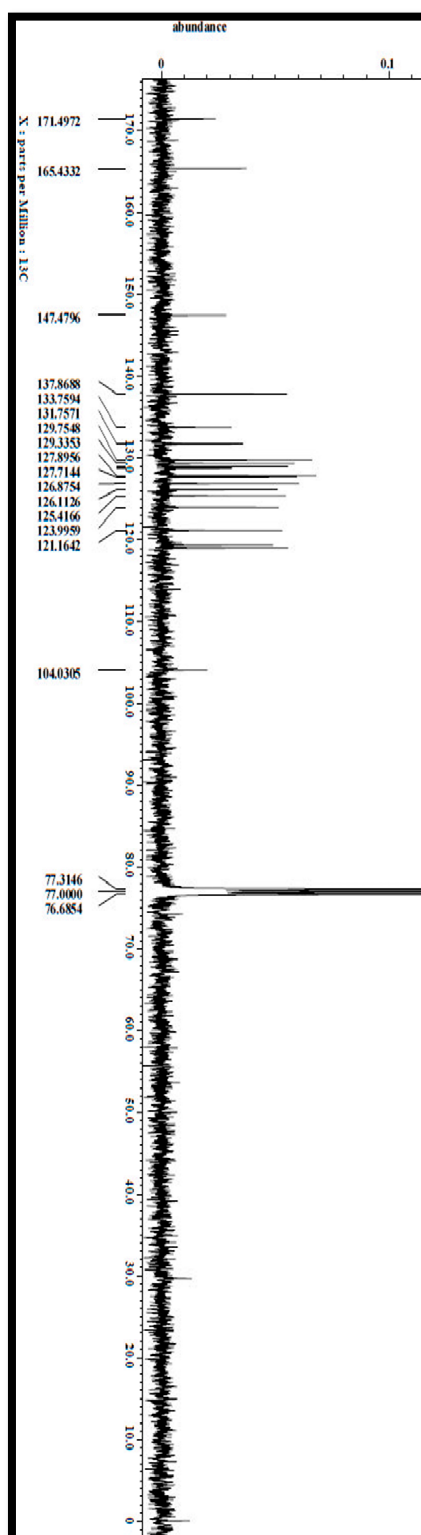

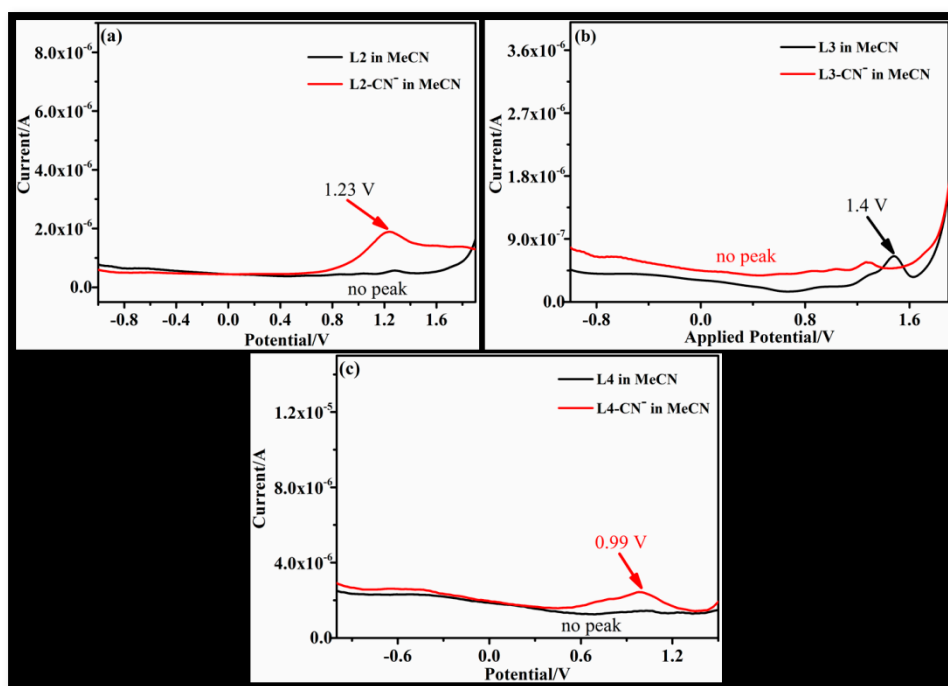

**Figure S10.** Cathodic voltammogram behavior of L2-L4 towards  $\text{CN}^-$  ions in MeCN medium
